# Supplementary material for: Expression profile analysis of cotton fiber secondary cell wall thickening stage
Source: PeerJ. 2024 Jul 8;12:e17682. doi: 10.7717/peerj.17682 (PMC11238726; doi:10.7717/peerj.17682)
Supplement: Supplemental Information 4 [file peerj-12-17682-s004.xlsx]

## Sheet: Sheet1
GeneID-RNA-seq	HL-20	HL-25	HL-30	L-20	L-25	L-30	S-20	S-25	S-30
Polyphenol oxidase-9	0.855627	20.2768	5.87212	0.0818647	4.80116	124.6	1.52273	6.05015	15.9703
WRKY transcription factor 32	2.03062	47.8524	16.5168	7.38287	32.2841	70.4068	5.57924	22.1109	44.5581
GDSL-like Lipase/Acylhydrolase superfamily protein isoform 1	2.62392	87.5706	31.5044	1.38624	81.5397	21.733	1.2823	18.4515	70.0745
Caffeic acid O-methyltransferase 1	12.0835	171.327	121.912	3.65895	199.048	38.4369	9.22867	40.4798	132.797
NAD(P)-binding Rossmann-fold superfamily protein isoform 1	1	2.53125	30.4622	0.286148	13.1858	23.5539	0.700331	2.08497	5.55221
2,4-dienoyl-CoA reductase isoform 2	61.7762	174.653	185.112	117.066	179.358	191.477	94.2487	125.604	171.036
WRKY transcription factor 103	0.34714	26.6154	106.83	1.16248	14.0875	65.5114	0.97546	6.91446	17.4176
Fatty acid desaturase 6 isoform 1	1.42617	36.3756	83.7755	12.2808	39.2438	39.4505	7.09025	19.9942	44.0356
3-ketoacyl-CoA synthase 3	41.6271	16.8904	0.113367	33.0572	3.12832	13.9177	41.8174	25.0816	16.1868
GeneID-RT-qPCR	HL-20	HL-25	HL-30	L-20	L-25	L-30	S-20	S-25	S-30
Polyphenol oxidase-9	1	20.64	4.35	0.15	6.57	120.63	1.64	5.2	16.75
	1.06	20.04	4	0.19	6.07	119.12	1.45	5	15.85
	0.95	21.61	4.15	0.11	6.67	122.33	1.73	5.3	16.15
WRKY transcription factor 32	1	25.37	6.18	4.52	17.42	25.94	3.21	8.63	16.29
	1.2	24.18	7.11	3.82	15.22	23.88	3	8.15	15.29
	0.9	26.33	5.24	5.11	18.35	26.18	2.8	8.26	17.3
GDSL-like Lipase/Acylhydrolase superfamily protein isoform 1	1	92.57	70.29	4.12	81.83	63.36	5.74	54.65	75.68
	1	94	68	3.2	79	60	5	52	70
	1	90	73	4.6	86	57	5.55	57	77
Caffeic acid O-methyltransferase 1	1	84.35	58.64	2.47	92.19	21.69	6.87	27.36	40.52
	1	80	60	1.88	95	19	5.98	26.32	43.55
	1	88	55	2.03	90	23.22	5.33	29.66	38.22
NAD(P)-binding Rossmann-fold superfamily protein isoform 1	1	11.92	44.39	2.17	50.24	36.27	4.67	9.53	19.18
	0.8	10	41	2.08	53	33	3.98	8.8	18
	1.2	12.99	47	1.89	48	38	4.22	9.96	23
2,4-dienoyl-CoA reductase isoform 2	1	2.64	2.78	1.73	2.86	2.91	1.48	1.87	2.38
	0.89	2.33	2.66	1.66	2.65	2.78	1.22	1.76	2.18
	1.12	2.57	2.9	1.99	3.03	3.32	1.56	1.65	2.56
WRKY transcription factor 103	1	60.28	283.65	4.15	35.81	170.34	2.47	20.72	52.82
	0.86	57	263	3.88	38	166	2.88	18	55
	1.24	63	300	4.55	32	173	2.08	23	49
Fatty acid desaturase 6 isoform 1	0.8	24.31	39.14	9.29	26.17	24.97	6.16	11.45	26.82
	0.9	22	36	8.6	22.45	26.88	5.88	12.55	22
	1	26	41	11.2	23.11	22.35	7.32	13.22	28
3-ketoacyl-CoA synthase 3	1	0.38	0.01	0.65	0.11	0.28	0.96	0.69	0.42
	0.8	0.33	0.03	0.55	0.21	0.22	0.84	0.66	0.38
	0.8	0.31	0.01	0.45	0.11	0.26	0.88	0.6	0.48
