# Supplementary material for: Expression profile analysis of cotton fiber secondary cell wall thickening stage
Source: PeerJ. 2024 Jul 8;12:e17682. doi: 10.7717/peerj.17682 (PMC11238726; doi:10.7717/peerj.17682)
Supplement: Supplemental Information 5 [file peerj-12-17682-s005.xls]

## Sheet: Sheet1
	62-33（S）				17-24（L）				Xinhai 32（HL）
Traits	I	II	III	Mean	I	II	III	Mean	I	II	III	Mean
Boll weight (g)	5.597	5.636	5.727	5.65333	5.835	5.86	5.825	5.84	2.685	2.493	2.789	2.65567
Lint percentage (%)	39.3916	39.3745	39.7884	39.5182	39.7455	39.6382	39.2488	39.5442	30.41	30.67	30.23	30.4367
100 seed weight (g)	18.7	17.9	19	18.5333	19	19.6	19.5	19.3667	19.7	19.3	19.2	19.4
Lint index (g)	7.5	7.2	7.6	7.43333	7.3	7.5	7.7	7.5	6.1	6.1	6	6.06667
Seed index (g)	11.2	10.7	11.4	11.1	11.7	12.1	11.8	11.8667	13.6	13.2	13.2	13.3333
Fiber length (mm)	28.7	29.1	28.9	28.9	33.7	33.2	33.3	33.4	39.8	38.9	40.6	39.7667
Fiber uniformity ratio (%)	87.2	87.3	87.8	87.4333	87.2	88.5	87.5	87.7333	90.2	90.1	90.1	90.1333
Micronaire (MIC)	4.6	4.54	4.77	4.63667	4.55	4.41	4.68	4.54667	3.73	3.98	3.81	3.84
Fiber strength (cN/tex)	31.6	31.7	31.2	31.5	37.4	37.8	38	37.7333	59.5	59.8	60.5	59.9333
Fiber elongation (%)	7	7.1	7.1	7.06667	7.1	7	7	7.03333	7.7	7.7	7.6	7.66667
Oil content (%)	28.3925	28.5159	28.382	28.4301	30.3996	31.0767	29.6816	30.386	35.982	34.8612	35.1998	35.3477
