# Supplementary material for: Expression profile analysis of cotton fiber secondary cell wall thickening stage
Source: PeerJ. 2024 Jul 8;12:e17682. doi: 10.7717/peerj.17682 (PMC11238726; doi:10.7717/peerj.17682)
Supplement: Supplemental Information 8 [file peerj-12-17682-s008.xls]

## Sheet: Sheet1
ITEM TO CHECK	IMPORTANCE	CHECKLIST
EXPERIMENTAL DESIGN
Definition of experimental and control groups	E	62-33（S）/ 17-24（L）/Xinhai 32（HL）	table 1
Number within each group	E	3	table 1
Assay carried out by core lab or investigator's lab?	D	Both	table 1
Acknowledgement of authors' contributions	D	Yes
SAMPLE
Description	E	Fiber seeds ovule	table 1
Volume/mass of sample processed	D	15g fiber	table 1
Microdissection or macrodissection	E	macrodissection	table 1
Processing procedure	E	RNA extraction	L130
If frozen - how and how quickly?	E	Liquid nitrogen quick freezing	L131
If fixed - with what, how quickly?	E	NOT involved	L132
Sample storage conditions and duration (especially for FFPE samples)	E	NOT involved	L133
NUCLEIC ACID EXTRACTION
Procedure and/or instrumentation	E	RNA extraction, library construction, and sequencing	L169
Name of kit and details of any modifications	E	RNAprep pure plant kit (TIANGEN, China)	L170
Source of additional reagents used	D	Beckman Coulter, Beverly, USA	L171
Details of DNase or RNAse treatment	E	RNAs were treated with DNase I	L172
Contamination assessment (DNA or RNA)	E	NO Contamination	L173
Nucleic acid quantification	E	Good	L174
Instrument and method	E	RNAprep pure plant kit	L175
Purity (A260/A280)	D	2.14	L176
Yield	D	1μg	L177
RNA integrity method/instrument	E	RIN	L178
RIN/RQI or Cq of 3' and 5' transcripts	E	RIN:10	L179
Electrophoresis traces	D
Inhibition testing (Cq dilutions, spike or other)	E	Cq dilutions	L181
REVERSE TRANSCRIPTION
Complete reaction conditions	E	The RNA (1 mg) was used as a template for cDNA synthesis with the RT primer Mix (Random 6mers and Oligo dT Primer mixed) and PrimerScript RT Enzyme Mix I (TaKaRa).	L176
Amount of RNA and reaction volume	E	1 μL and 20 μL	L177
Priming oligonucleotide (if using GSP) and concentration	E	Random 6mers and Oligo dT Primer mixed	L178
Reverse transcriptase and concentration	E	RevertAid m-mul URT 1ul	L179
Temperature and time	E	oligodT：42℃ 60min, Reverse transcriptase 70℃ 5min	L180
Manufacturer of reagents and catalogue numbers	D
Cqs with and without RT	D*
Storage conditions of cDNA	D
qPCR TARGET INFORMATION
If multiplex, efficiency and LOD of each assay.	E
Sequence accession number	E	CRA009299	L157
Location of amplicon	D
Amplicon length	E	300	L160
In silico specificity screen (BLAST, etc)	E	BOWTIE2	L160
Pseudogenes, retropseudogenes or other homologs?	D
Sequence alignment	D
Secondary structure analysis of amplicon	D
Location of each primer by exon or intron (if applicable)	E
What splice variants are targeted?	E	No
qPCR OLIGONUCLEOTIDES
Primer sequences	E	Tabls S1
RTPrimerDB Identification Number	D
Probe sequences	D**
Location and identity of any modifications	E	No
Manufacturer of oligonucleotides	D	Sangon Biotech
Purification method	D
qPCR PROTOCOL
Complete reaction conditions	E		L169-L179
Reaction volume and amount of cDNA/DNA	E	0.5 μL and 10 μL	L169-L179
Primer, (probe), Mg++ and dNTP concentrations	E	250nM	L169-L179
Polymerase identity and concentration	E	0.1μL	L169-L179
Buffer/kit identity and manufacturer	E	TaKaRa	L169-L179
Exact chemical constitution of the buffer	D
Additives (SYBR Green I, DMSO, etc.)	E	SYBRGreen PCR Mastermix (TaKaRa)	L169-L179
Manufacturer of plates/tubes and catalog number	D
Complete thermocycling parameters	E	TaKaRa	L169-L179
Reaction setup (manual/robotic)	D
Manufacturer of qPCR instrument	E	ABI	L169-L179
qPCR VALIDATION
Evidence of optimisation (from gradients)	D
Specificity (gel, sequence, melt, or digest)	E
For SYBR Green I, Cq of the NTC	E
Standard curves with slope and y-intercept	E
PCR efficiency calculated from slope	E
Confidence interval for PCR efficiency or standard error	D
r2 of standard curve	E
Linear dynamic range	E
Cq variation at lower limit	E
Confidence intervals throughout range	D
Evidence for limit of detection	E
If multiplex, efficiency and LOD of each assay.	E
DATA ANALYSIS
qPCR analysis program (source, version)	E
Cq method determination	E	2-∆∆Ct method	L169-L179	Figure 8
Outlier identification and disposition	E
Results of NTCs	E	0	L169-L179	Figure 8
Justification of number and choice of reference genes	E	1	L169-L179	Figure 8
Description of normalisation method	E
Number and concordance of biological replicates	D
Number and stage (RT or qPCR) of technical replicates	E	3	L160-L179	Figure 8
Repeatability (intra-assay variation)	E	High	L160-L179	Figure 8
Reproducibility (inter-assay variation, %CV)	D
Power analysis	D
Statistical methods for result significance	E	ANOVA	L160-L179	Figure 8
Software (source, version)	E	R.4.3.2	L160-L179	Figure 8
Cq or raw data submission using RDML	D
Table 1. MIQE checklist for authors, reviewers and editors. All essential information (E) must be submitted with the manuscript. Desirable
information (D) should be submitted if available. If using primers obtained from RTPrimerDB, information on qPCR target, oligonucleotides,
protocols and validation is available from that source.
*: Assessing the absence of DNA using a no RT assay is essential when first extracting RNA. Once the sample has been validated as
RDNA-free, inclusion of a no-RT control is desirable, but no longer essential.
**: Disclosure of the probe sequence is highly desirable and strongly encouraged. However, since not all commercial pre-designed assay
vendors provide this information, it cannot be an essential requirement. Use of such assays is advised against.
